# Supplementary material for: The palladium-catalyzed tandem decarboxylation, carbon–carbon triple bond oxidation and decarbonylative arylation of the benzoxazole C–H bond
Source: Royal Society of Chemistry journal article supplement (doi:10.1039/c3ra41185k), 2013-01-01
Supplement: c3ra41185k.pdf [file c3ra41185k.pdf]

S1

# Supporting Information

The Palladium-Catalyzed Tandem Decarboxylation, Carbon-Carbon Triple Bond Oxidation and Decarbonylative Arylation of Benzoxazole C-H Bond

Dongfang Liu, Bin Liu, and Jiang Cheng\*

E-mail: jiangcheng@cczu.edu.cn

|                                                                                        |              |
|----------------------------------------------------------------------------------------|--------------|
| <b>1) General methods.....</b>                                                         | <b>S2</b>    |
| <b>2) Optimization of the reaction of benzoxazole with 3-phenylpropionic acid.....</b> | <b>S2</b>    |
| <b>3) Spectral data for the products.....</b>                                          | <b>S3-6</b>  |
| <b>4) Reference.....</b>                                                               | <b>S6</b>    |
| <b>5) Copies of <sup>1</sup>H NMR and <sup>13</sup>C NMR spectra.....</b>              | <b>S7-22</b> |

S2

**1).General methods:**

Chemicals were either purchased or purified by standard techniques without special instructions.  $^1\text{H}$  NMR and  $^{13}\text{C}$  NMR spectra were measured on a 500 MHz spectrometer ( $^1\text{H}$  500 MHz,  $^{13}\text{C}$  125 MHz), using  $\text{CDCl}_3$  as the solvent with tetramethylsilane (TMS) as the internal standard at room temperature. Chemical shifts ( $\delta$ ) are given in ppm relative to TMS, the coupling constants  $J$  are given in Hz.

**2). Optimization of the reaction of benzoxazole with 3-phenylpropionic acid:**

The mixture of benzoxazole (22  $\mu\text{L}$ , 0.2 mmol), 3-phenylpropionic acid (43 mg, 0.3 mmol)/phenylacetylene (30.6 mg, 0.3mmol),  $\text{Pd}(\text{dba})_2$  (5.7 mg, 5 mol %),  $\text{Cs}_2\text{CO}_3$  (130 mg, 0.4 mmol) and  $\text{Ag}_2\text{CO}_3$  (54 mg, 0.2 mmol) in DMF (2 mL) and DMSO (100  $\mu\text{L}$ ) was stirred at 140 °C under Oxygen atmosphere for 11 h. After the completion of the reaction, as monitored by TLC, the solvent was concentrated in vacuo and the residue was purified by flash column chromatography on silica gel (300-400 mesh) with petroleum ether-EtOAc as eluent to give the desired product.

### 3) Spectral data for the products

#### 2-phenylbenzo[d]oxazole (3aa)<sup>1</sup>

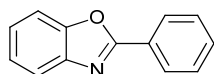

<sup>1</sup>H NMR (CDCl<sub>3</sub>, 500 MHz): δ 8.27-8.26 (m, 2H), 7.80-7.77 (m, 1H), 7.60-7.51 (m, 4H), 7.37-7.34 (m, 2H).

<sup>13</sup>C NMR (CDCl<sub>3</sub>, 125 MHz): δ 163.1, 150.8, 142.1, 131.5, 128.9, 127.6, 127.2, 125.1, 124.6, 120.0, 110.6.

#### 6-Methyl-2-phenylbenzo[d]oxazole (3ba)<sup>1</sup>

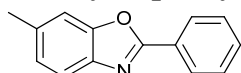

<sup>1</sup>H NMR (CDCl<sub>3</sub>, 500 MHz): δ 8.24-8.23 (m, 2H), 7.64 (d, *J* = 8.0 Hz, 1H), 7.52-7.51 (m, 3H), 7.38 (s, 1H), 7.17 (d, *J* = 8.0 Hz, 1H), 2.51 (s, 3H).

<sup>13</sup>C NMR (CDCl<sub>3</sub>, 125 MHz): δ 162.6, 151.1, 140.0, 135.5, 131.2, 128.8, 127.4, 127.4, 125.8, 119.3, 110.7, 21.8.

#### 5-methyl-2-phenylbenzo[d]oxazole (3ca)<sup>1</sup>

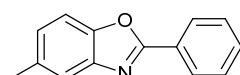

<sup>1</sup>H NMR (CDCl<sub>3</sub>, 500 MHz): δ 8.25-8.23 (m, 2H), 7.56-7.50 (m, 4H), 7.45 (d, *J* = 8.5 Hz, 1H), 7.16 (d, *J* = 8.0 Hz, 1H), 2.49 (s, 3H).

<sup>13</sup>C NMR (CDCl<sub>3</sub>, 125 MHz): δ 163.1, 149.0, 142.3, 134.4, 131.4, 128.8, 127.5, 127.3, 126.2, 120.0, 110.0, 21.5.

#### 5-Chloro-2-phenylbenzo[d]oxazole (3da)<sup>2</sup>

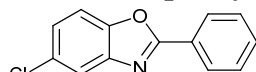

<sup>1</sup>H NMR (CDCl<sub>3</sub>, 500 MHz): δ 8.23 (d, *J* = 7.0 Hz, 2H), 7.75 (s, 1H), 7.56-7.48 (m, 4H), 7.32 (d, *J* = 8.5 Hz, 1H).

<sup>13</sup>C NMR (CDCl<sub>3</sub>, 125 MHz): δ 164.4, 149.4, 143.3, 131.9, 130.0, 129.0, 127.8, 126.7, 125.3, 120.0, 111.3.

#### 5-tert-butyl-2-phenylbenzo[d]oxazole (3ea)<sup>3</sup>

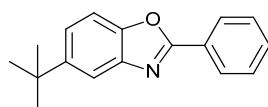

<sup>1</sup>H NMR (CDCl<sub>3</sub>, 500 MHz): δ 8.27-8.25 (m, 2H), 7.81 (d, *J* = 1.5 Hz, 1H), 7.53-7.49 (m, 4H), 7.42 (m, 1H), 1.41 (s, 9H).

<sup>13</sup>C NMR (CDCl<sub>3</sub>, 125 MHz): δ 163.2, 148.8, 148.1, 142.0, 131.3, 128.9, 127.5, 127.4, 122.8, 116.5, 109.7, 34.9, 31.7.

#### Ethyl 5-carboxylate-2-phenylbenzo[d]oxazole (3fa)<sup>2</sup>

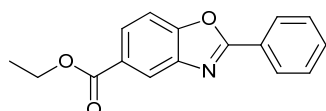

<sup>1</sup>H NMR (CDCl<sub>3</sub>, 500 MHz): δ 8.48 (s, 1H), 8.27 (d, *J* = 8.0 Hz, 2H), 8.12 (d, *J* = 8.5 Hz, 1H), 7.62-7.53 (m, 4H), 4.43 (q, *J* = 7.0 Hz, 2H), 1.43 (t, *J* = 7.0 Hz, 3H).

S4

$^{13}\text{C}$  NMR ( $\text{CDCl}_3$ , 125 MHz):  $\delta$  166.2, 153.6, 142.2, 131.9, 129.0, 127.8, 127.4, 127.0, 126.7, 122.0, 110.3, 61.2, 29.7, 14.3.

**5-(4-methoxyphenyl)-2-phenylbenzo[d]oxazole (3ga)**

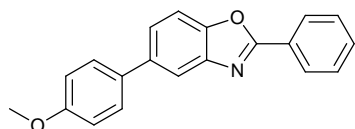

$^1\text{H}$  NMR ( $\text{CDCl}_3$ , 500 MHz):  $\delta$  8.30-8.27 (m, 2H), 7.92 (d,  $J = 2.0\text{ Hz}$ , 1H), 7.62-7.52 (m, 7H), 7.03-7.00 (m, 2H), 3.87 (s, 3H).

$^{13}\text{C}$  NMR ( $\text{CDCl}_3$ , 125 MHz):  $\delta$  163.6, 159.2, 150.0, 142.7, 138.1, 133.6, 131.5, 128.9, 128.4, 127.6, 127.2, 124.4, 117.9, 114.3, 110.5, 55.4.

IR (prism,  $\text{cm}^{-1}$ ): 1712, 1223, 1108, 807, 744, 703.

HRMS exact mass calc'd for  $\text{C}_{20}\text{H}_{16}\text{NO}_2$  ( $[\text{M}+\text{H}]^+$ ): 302.1176; found  $m/z$ : 302.1188.

**5-(3,5-dimethylphenyl)-2-phenylbenzo[d]oxazole (3ha)**

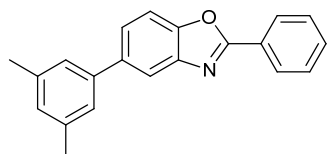

$^1\text{H}$  NMR ( $\text{CDCl}_3$ , 500 MHz):  $\delta$  8.20-8.18 (m, 2H), 7.86 (d,  $J = 1.5\text{ Hz}$ , 1H), 7.53-7.44 (m, 5H), 7.17 (s, 2H), 6.94 (s, 1H), 2.32 (s, 6H).

$^{13}\text{C}$  NMR ( $\text{CDCl}_3$ , 125 MHz):  $\delta$  163.5, 150.2, 142.7, 141.1, 138.7, 138.4, 131.5, 129.0, 128.9, 127.6, 127.2, 125.4, 124.8, 118.4, 110.4, 21.4.

IR (prism,  $\text{cm}^{-1}$ ): 1716, 1222, 1019, 845, 805, 668.

HRMS exact mass calc'd for  $\text{C}_{21}\text{H}_{18}\text{NO}$  ( $[\text{M}+\text{H}]^+$ ): 300.1383; found  $m/z$ : 300.1384.

**2-phenyl-5-(*p*-tolyl)benzo[d]oxazole(3ia)**

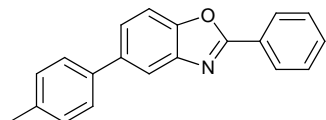

$^1\text{H}$  NMR ( $\text{CDCl}_3$ , 500 MHz):  $\delta$  8.30-8.27 (m, 2H), 7.96 (d,  $J = 1.5\text{ Hz}$ , 1H), 7.62 (d,  $J = 8.5\text{ Hz}$ , 1H), 7.58-7.53 (m, 6H), 7.29 (d,  $J = 8.0\text{ Hz}$ , 2H), 2.42 (s, 3H).

$^{13}\text{C}$  NMR ( $\text{CDCl}_3$ , 125 MHz):  $\delta$  163.6, 150.1, 142.7, 138.4, 138.2, 137.0, 131.5, 129.6, 128.9, 127.6, 127.3, 127.2, 124.6, 118.2, 110.50, 21.1.

IR (prism,  $\text{cm}^{-1}$ ): 1550, 1285, 1033, 804, 770, 687.

HRMS exact mass calc'd for  $\text{C}_{20}\text{H}_{16}\text{NO}$  ( $[\text{M}+\text{H}]^+$ ): 286.1226; found  $m/z$ : 286.1231.

**2-phenyl-5-(4-(trifluoromethyl)phenyl)benzo[d]oxazole (3ja)**

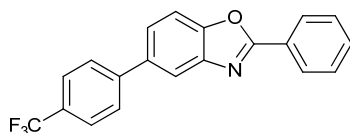

$^1\text{H}$  NMR ( $\text{CDCl}_3$ , 500 MHz):  $\delta$  8.29-8.27 (m, 2H), 7.97 (d,  $J = 1.5\text{ Hz}$ , 1H), 7.73 (t,  $J = 9.5\text{ Hz}$ , 4H), 7.66 (d,  $J = 8.5\text{ Hz}$ , 1H), 7.59-7.54 (m, 4H).

$^{13}\text{C}$  NMR ( $\text{CDCl}_3$ , 125 MHz):  $\delta$  164.0, 150.8, 144.5, 142.9, 136.9, 131.8, 129.3 (q,  $J = 32.5\text{ Hz}$ ), 129.0, 127.7, 124.7 (q,  $J = 270.2\text{ Hz}$ ), 126.9, 125.8 (q,  $J = 3.8\text{ Hz}$ ), 125.4, 124.7, 118.7, 110.9.

S5

IR (prism,  $\text{cm}^{-1}$ ): 1671, 1590, 1469, 1105, 821.

HRMS exact mass calc'd for  $\text{C}_{20}\text{H}_{13}\text{NO}$  ( $[\text{M}+\text{H}]^+$ ): 340.0944; found  $m/z$ : 340.0943.

**2-*p*-tolylbenzo[*d*]oxazole(3ab)<sup>2</sup>**

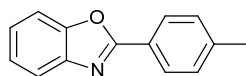

<sup>1</sup>H NMR ( $\text{CDCl}_3$ , 500 MHz):  $\delta$  8.15 (d,  $J = 8.5$  Hz, 2H), 7.78-7.75 (m, 1H), 7.58-7.55 (m, 1H), 7.36-7.32 (m, 4H), 2.44 (s, 3H).

<sup>13</sup>C NMR ( $\text{CDCl}_3$ , 125 MHz):  $\delta$  163.3, 150.7, 142.2, 142.0, 129.6, 127.6, 124.8, 124.5, 124.4, 119.8, 110.5, 21.6.

**2-(4-methoxyphenyl)benzo[*d*]oxazole(3ac)<sup>2</sup>**

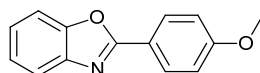

<sup>1</sup>H NMR ( $\text{CDCl}_3$ , 500 MHz):  $\delta$  8.20 (d,  $J = 8.5$  Hz, 2H), 7.75-7.73 (m, 1H), 7.56-7.54 (m, 1H), 7.35-7.30 (m, 2H), 7.04 (d,  $J = 8.0$  Hz, 2H), 3.89 (s, 3H).

<sup>13</sup>C NMR ( $\text{CDCl}_3$ , 125 MHz):  $\delta$  163.2, 162.3, 150.7, 142.3, 129.4, 124.6, 124.4, 119.7, 119.6, 114.4, 110.4, 55.4.

**2-(4-butylphenyl)benzo[*d*]oxazole (3ad)<sup>4</sup>**

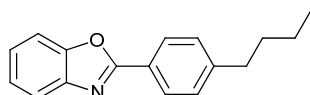

<sup>1</sup>H NMR ( $\text{CDCl}_3$ , 500 MHz):  $\delta$  8.17 (d,  $J = 8.5$  Hz, 2H), 7.78-7.76 (m, 1H), 7.58-7.56 (m, 1H), 7.36-7.32 (m, 4H), 2.70 (t,  $J = 7.5$  Hz, 2H), 1.69-1.62 (m, 2H), 1.42-1.34 (m, 2H), 0.95 (t,  $J = 7.5$  Hz, 3H).

<sup>13</sup>C NMR ( $\text{CDCl}_3$ , 125 MHz):  $\delta$  163.3, 150.7, 147.0, 142.2, 129.0, 127.6, 124.8, 124.6, 124.4, 119.8, 110.5, 35.7, 33.3, 22.3, 13.9.

**2-(4-Ethylphenyl)benzo[*d*]oxazole(3ae)<sup>1</sup>**

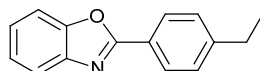

<sup>1</sup>H NMR ( $\text{CDCl}_3$ , 500 MHz):  $\delta$  8.18 (d,  $J = 8.5$  Hz, 2H), 7.78-7.76 (m, 1H), 7.58-7.57 (m, 1H), 7.37-7.33 (m, 4H), 2.74 (q,  $J = 7.5$  Hz, 2H), 1.30 (t,  $J = 7.5$  Hz, 3H).

<sup>13</sup>C NMR ( $\text{CDCl}_3$ , 125 MHz):  $\delta$  163.3, 150.7, 148.2, 142.2, 128.5, 127.7, 124.8, 124.6, 124.5, 119.8, 110.5, 28.9, 15.2.

**2-(4-chlorophenyl)benzo[*d*]oxazole(3af)<sup>2</sup>**

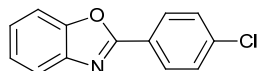

<sup>1</sup>H NMR ( $\text{CDCl}_3$ , 500 MHz):  $\delta$  8.19 (d,  $J = 8.5$  Hz, 2H), 7.78-7.76 (m, 1H), 7.59-7.58 (m, 1H), 7.50 (d,  $J = 9.0$  Hz, 2H), 7.38-7.36 (m, 2H).

<sup>13</sup>C NMR ( $\text{CDCl}_3$ , 125 MHz):  $\delta$  162.1, 150.8, 142.0, 137.8, 129.3, 128.9, 125.7, 125.4, 124.7, 120.1, 110.6.

S6

#### 4) References

- (1) A. Ghodbane, P. Jolinat and S. Fery-Forgues, *Langmuir*, 2012, **28**, 855.
- (2) W. Yoo, H. Yuan, H. Miyamura and S. Kobayashi, *Adv. Synth. Catal.*, 2011, **17**, 3085.
- (3) M. Zhang, S. Zhang, M. Liu and J. Cheng, *Chem. Commun.*, 2011, **47**, 11522.
- (4) S. Ueda and H. Nagasawa, *Angew. Chem. Int. Ed.*, 2008, **47**, 6411.

S7

### 5) Copies of the Products $^1\text{H}$ NMR and $^{13}\text{C}$ NMR :

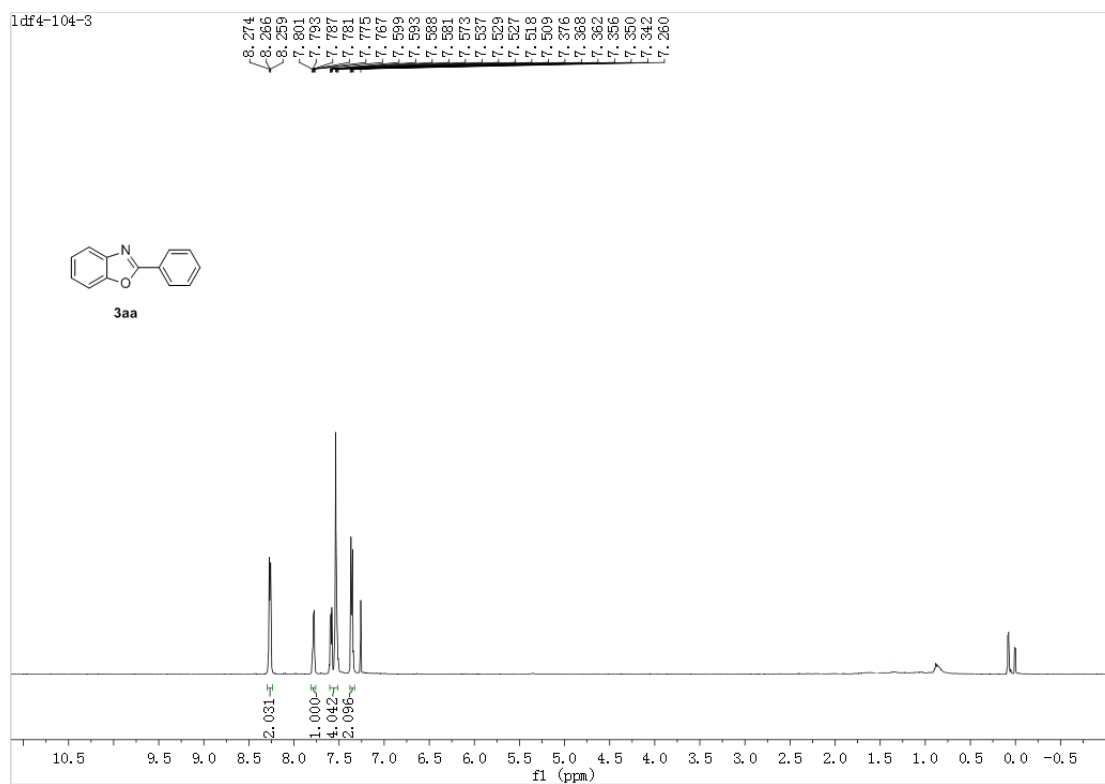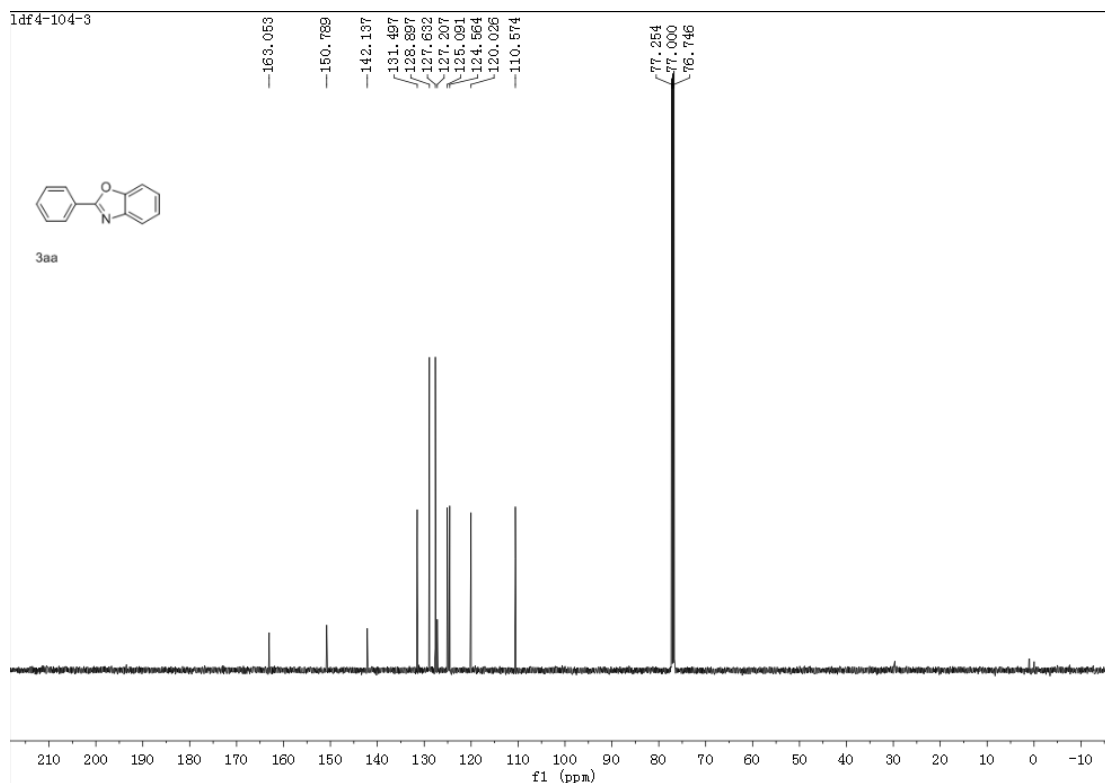

S7

S8

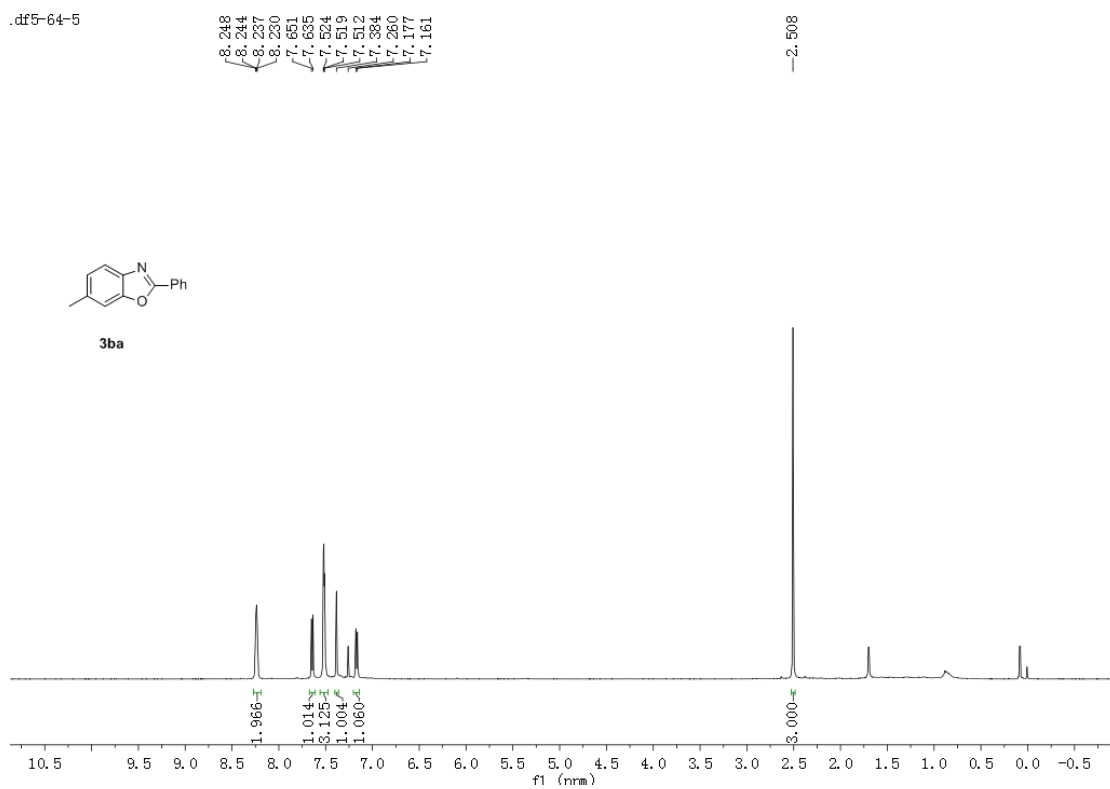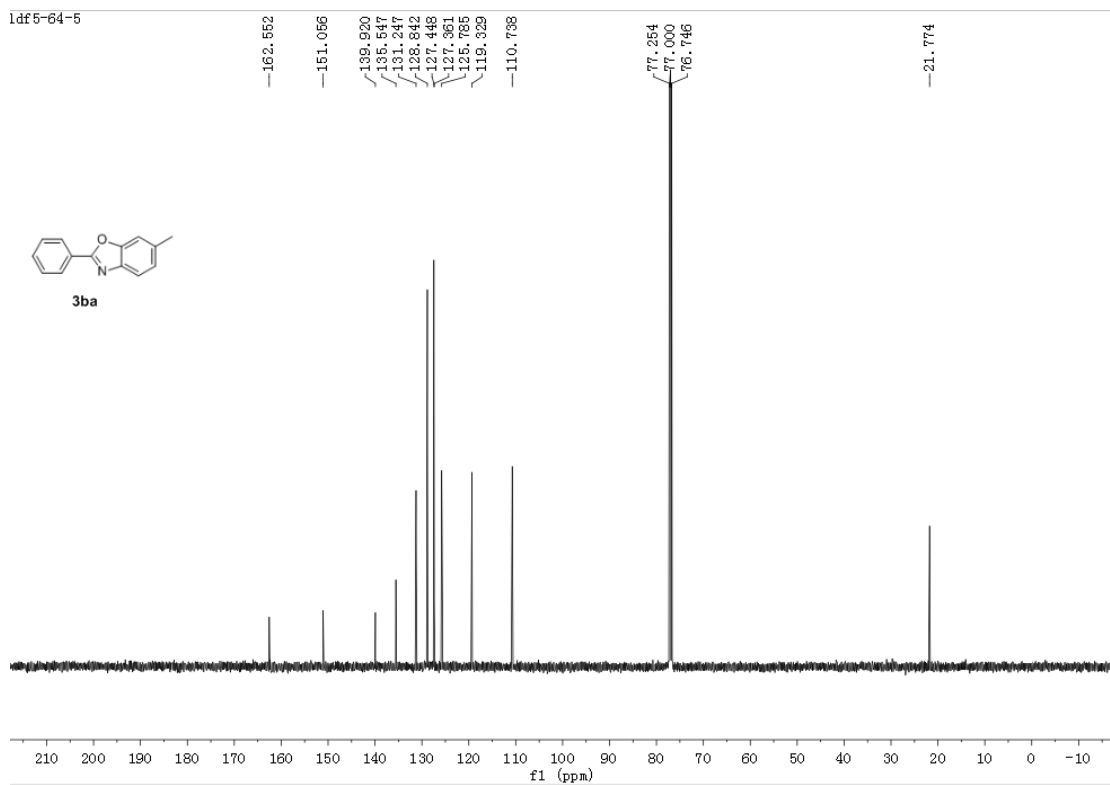

S8



S9

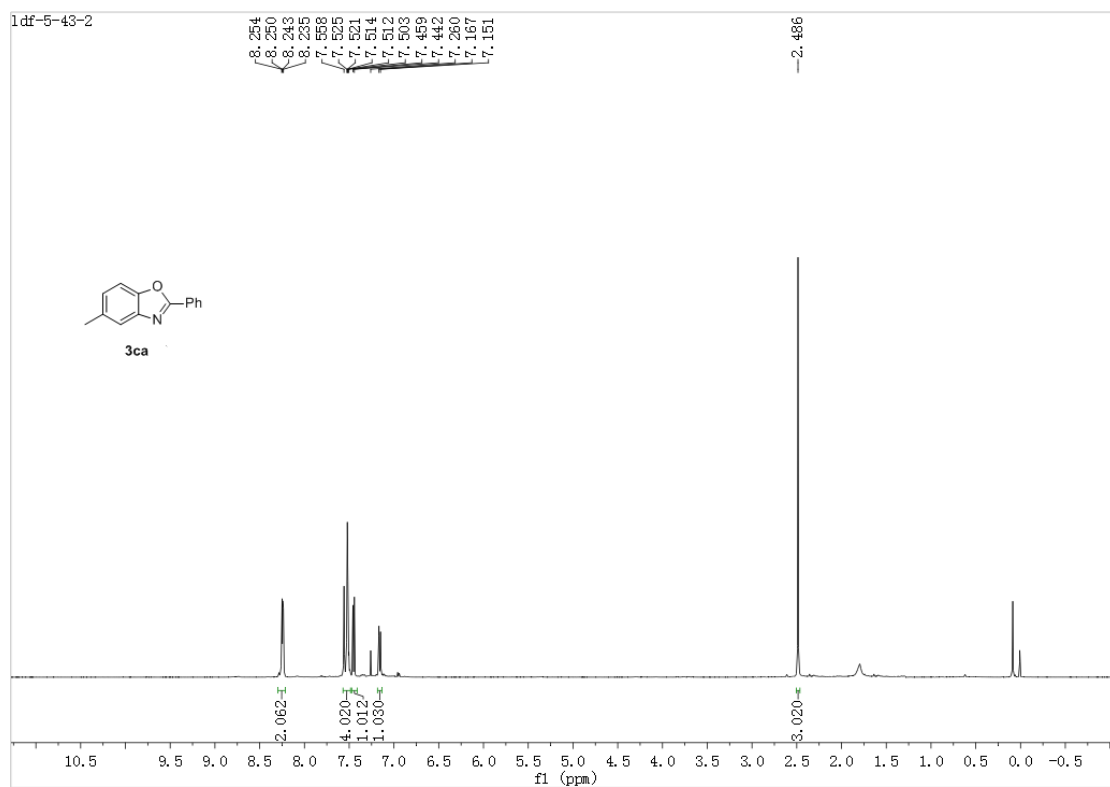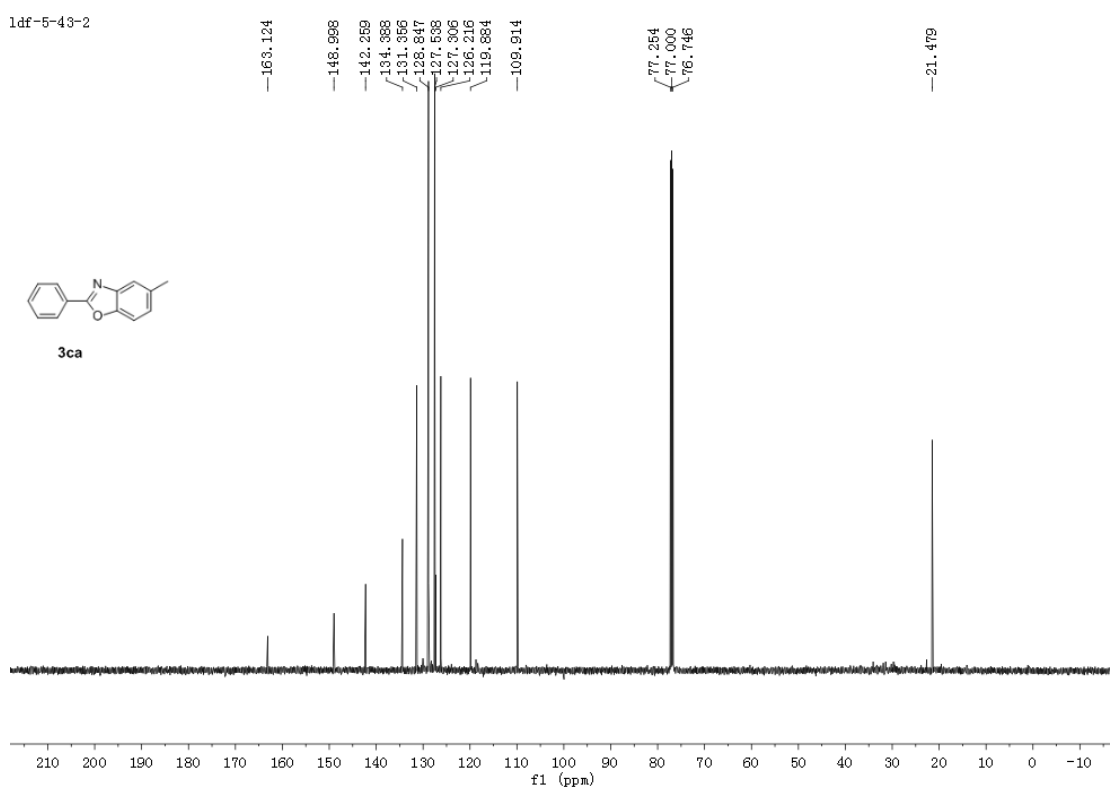

S9

# S10

ldf5-70-1

8.240  
8.226  
7.745  
7.556  
7.542  
7.526  
7.512  
7.501  
7.484  
7.327  
7.310  
7.260

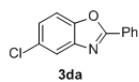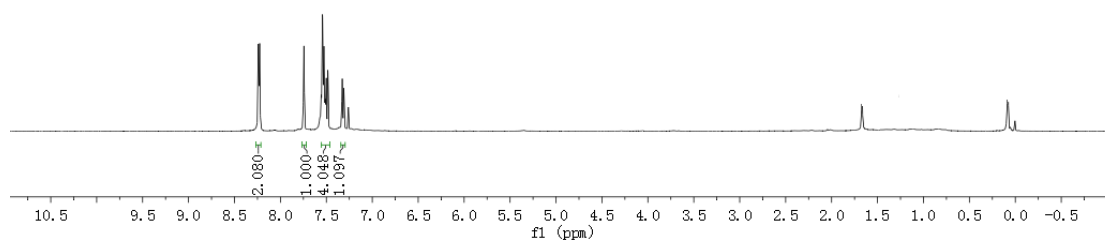

ldf5-70-1

164.360  
149.357  
143.277  
131.890  
130.045  
128.959  
127.752  
126.721  
125.843  
119.876  
111.259  
77.254  
77.000  
76.747

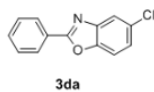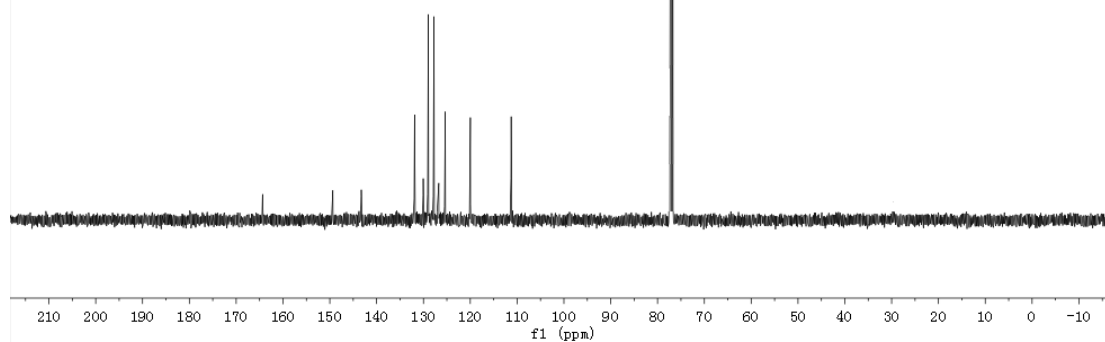

S11

ldf5-67-1

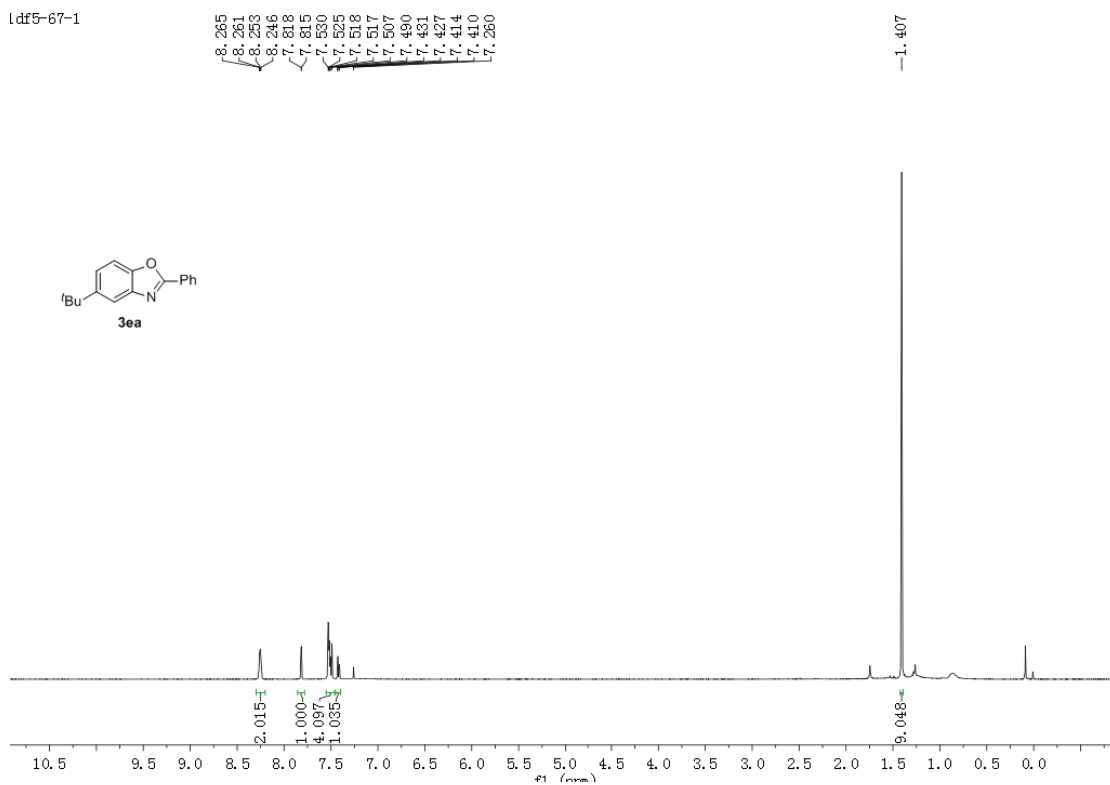

ldf5-67-1

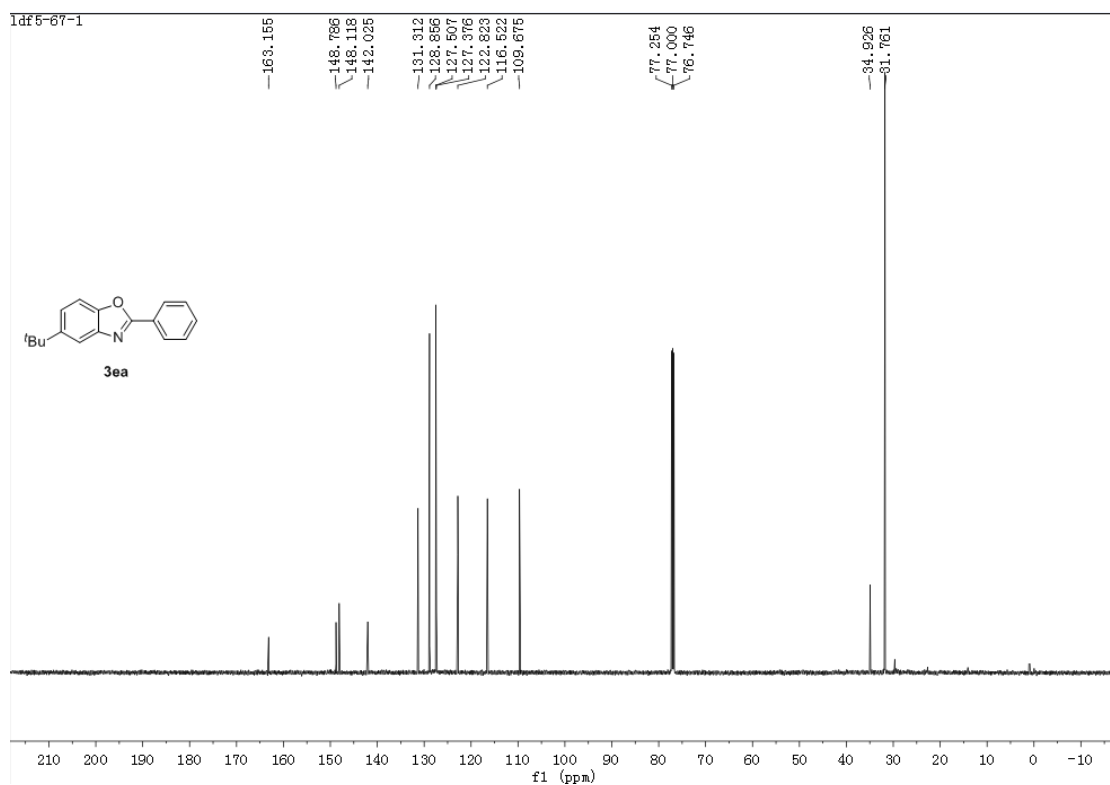

S11

# S12

1df5-70-2

8.482  
8.280  
8.264  
8.130  
8.113  
7.626  
7.609  
7.575  
7.561  
7.546  
7.533  
7.260  
4.449  
4.435  
4.420  
4.406  
1.448  
1.434  
1.420

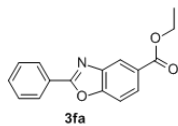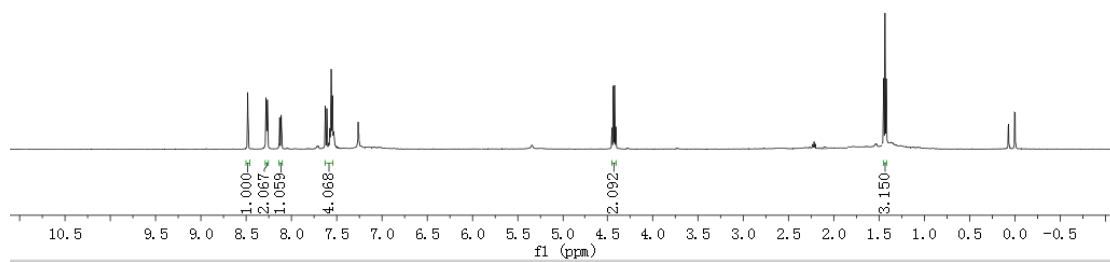

1df5-70-2

166.236  
153.640  
142.215  
131.941  
128.985  
127.810  
127.454  
127.009  
126.894  
121.969  
110.291  
77.254  
77.000  
76.746  
61.182  
29.679  
14.322

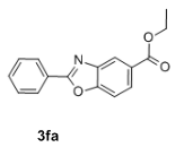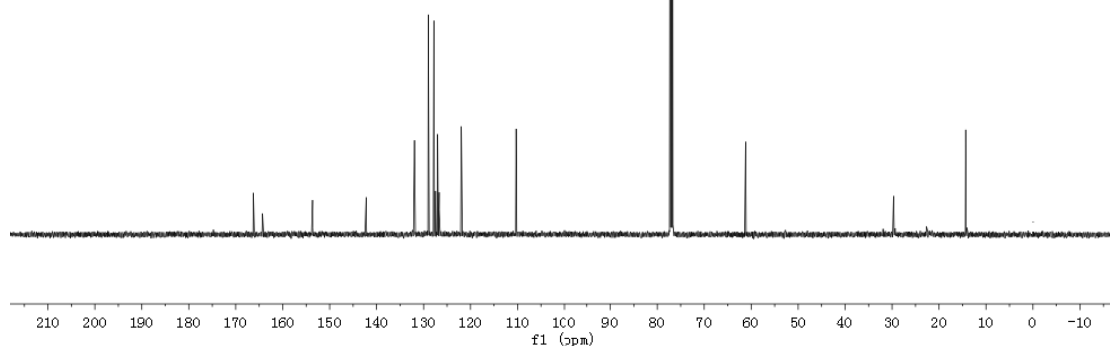

S13

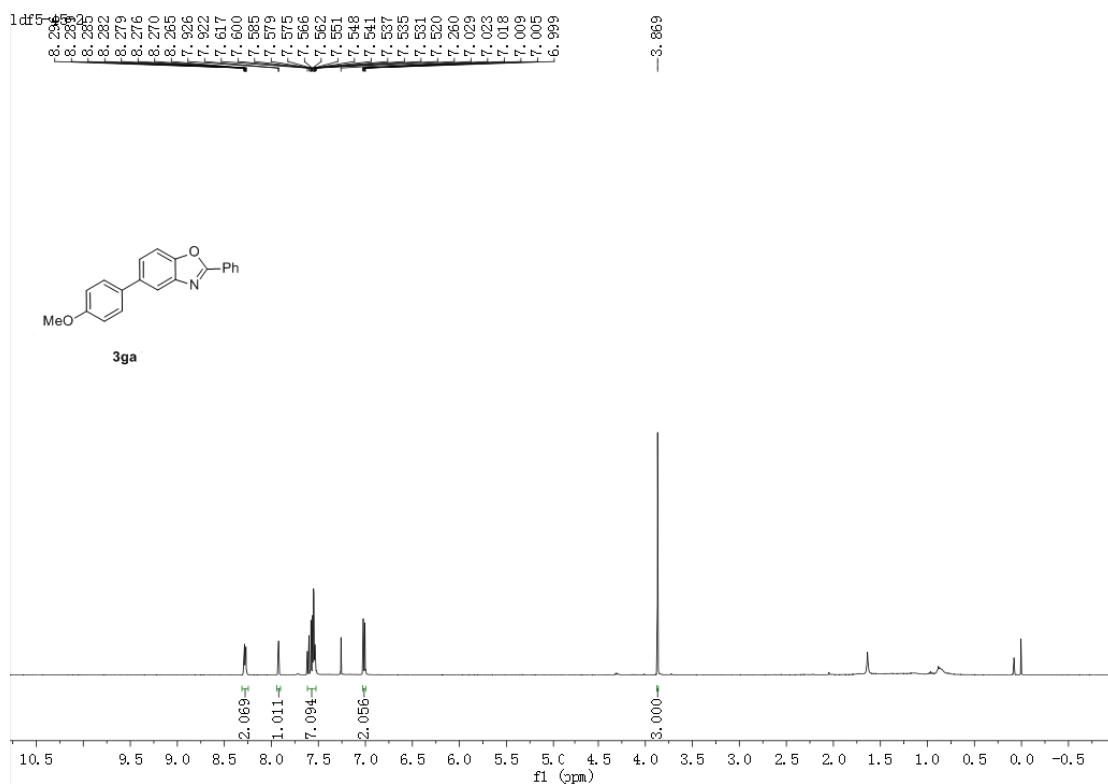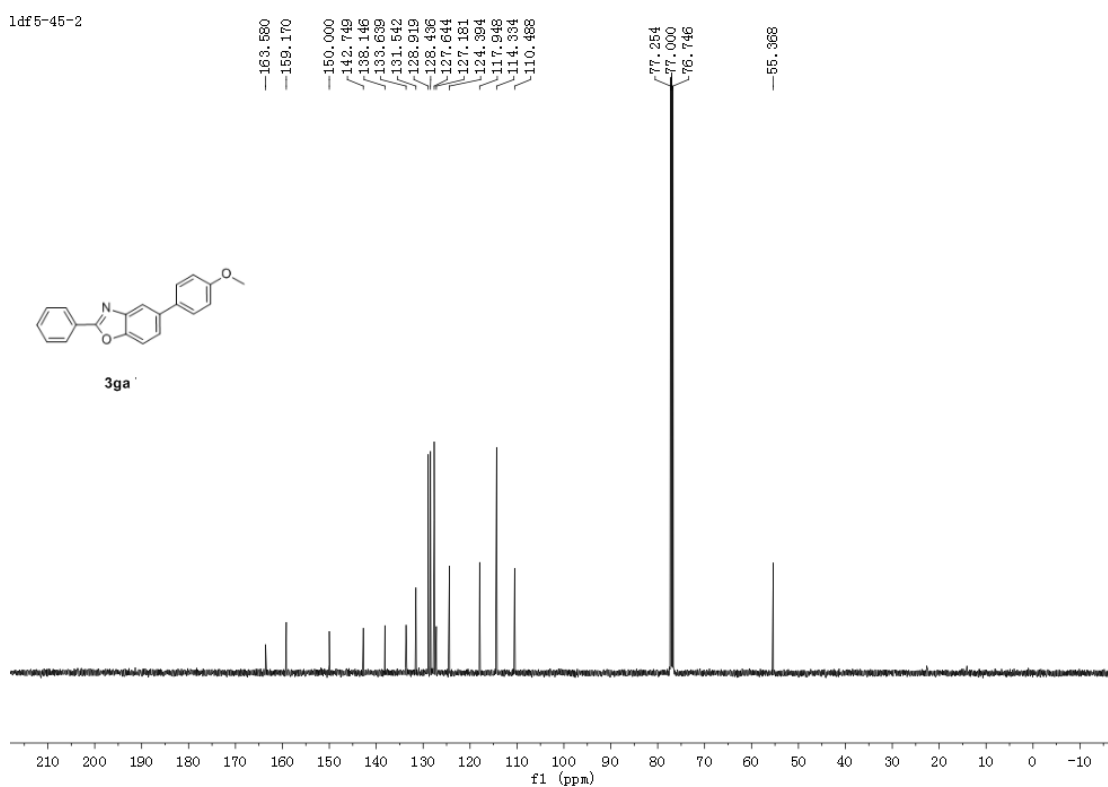

S13

S14

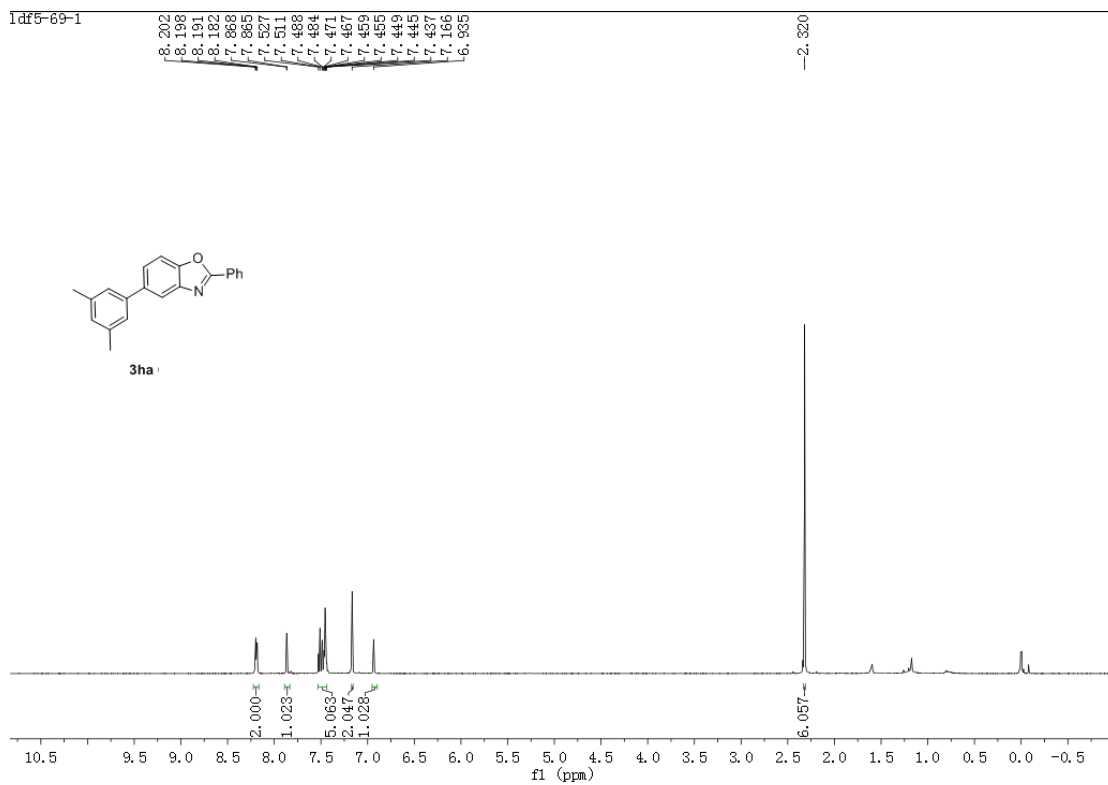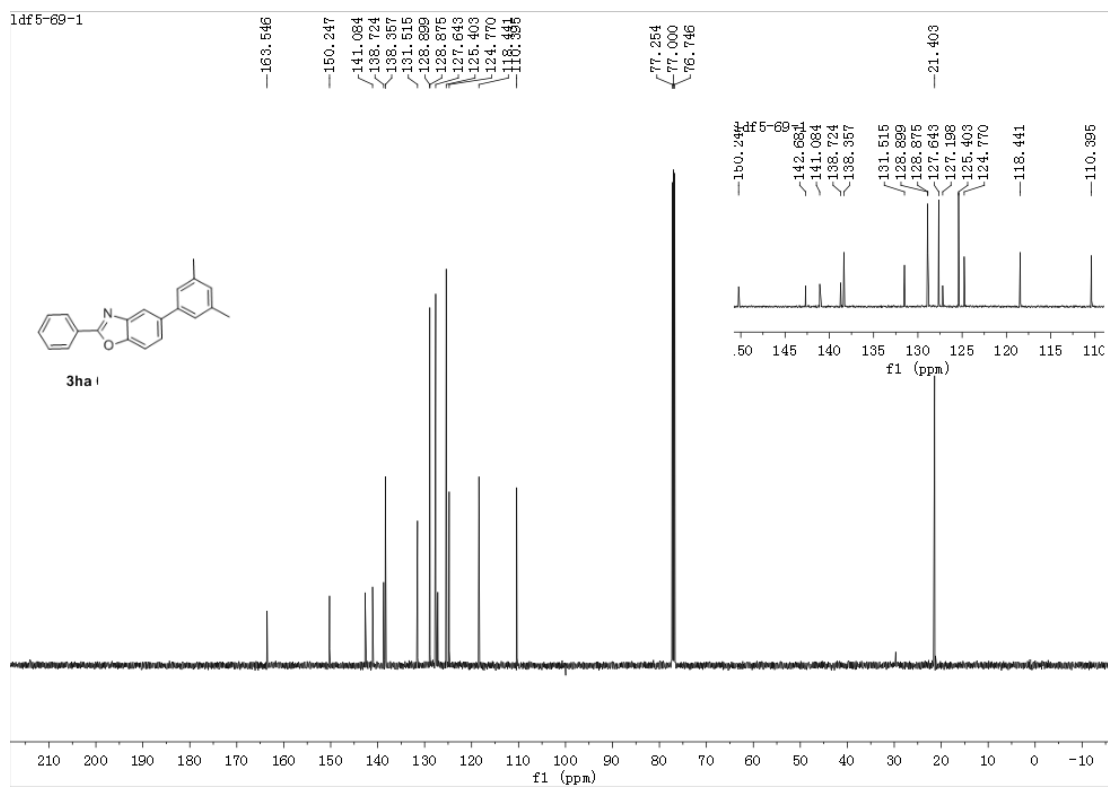

S14

S15

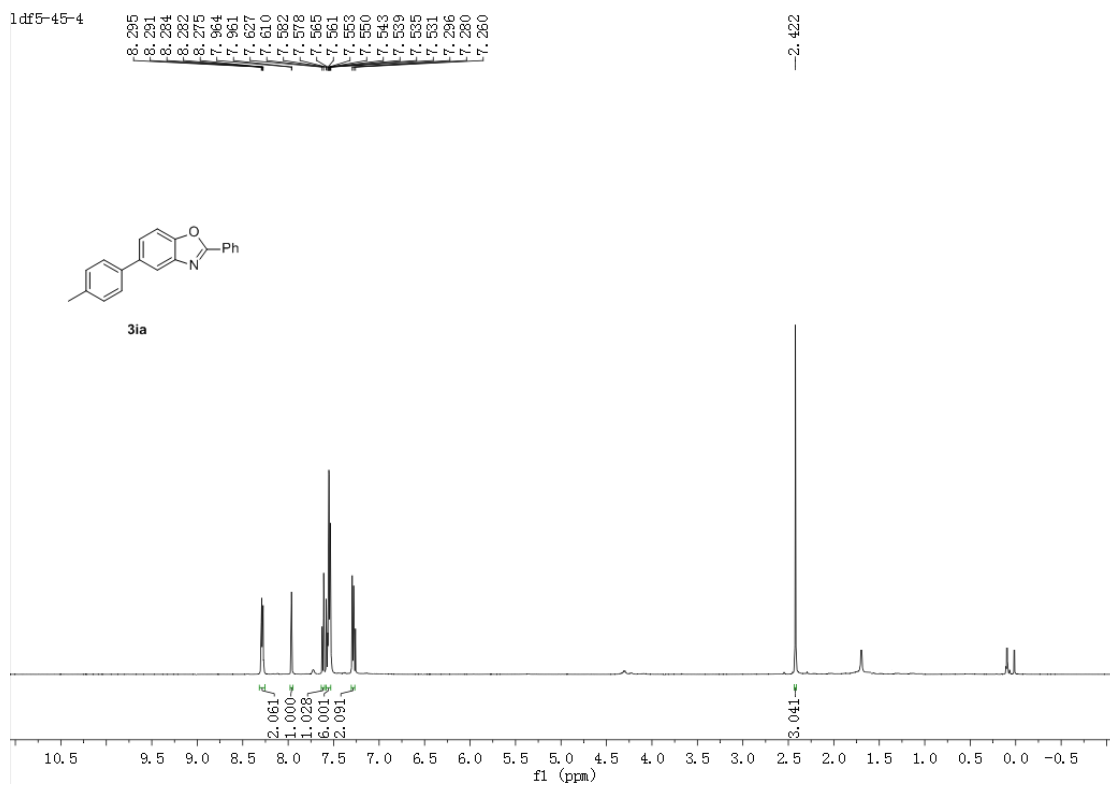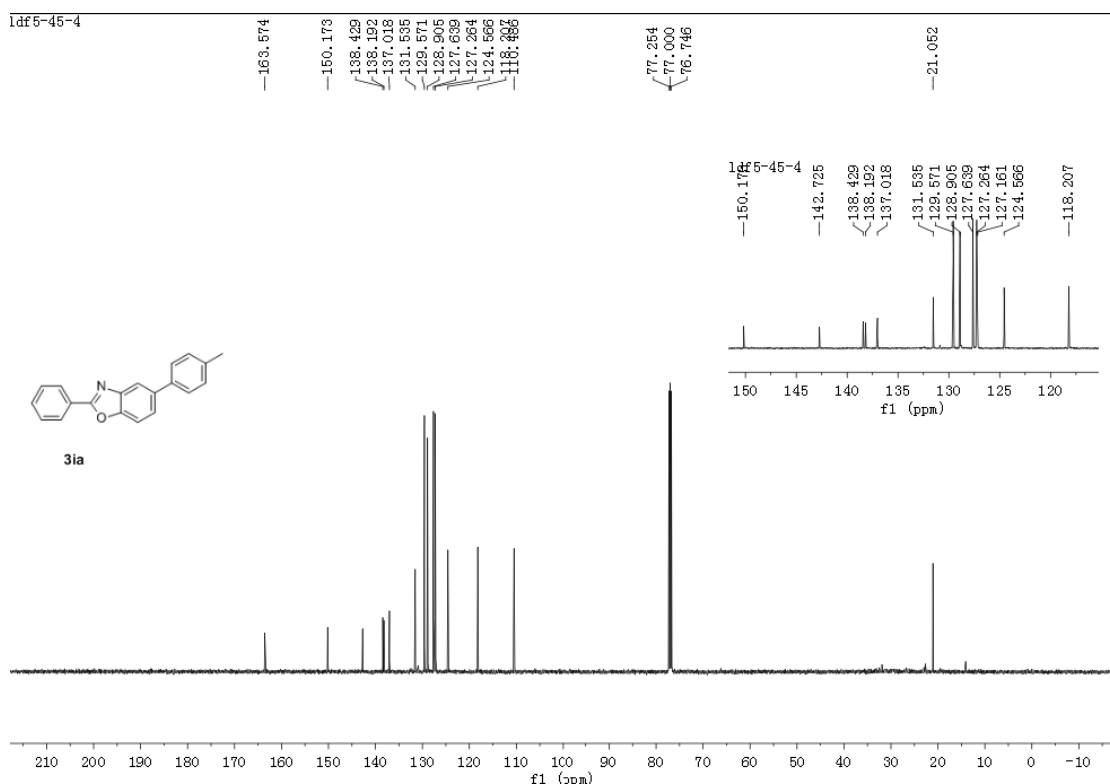

S15

S16

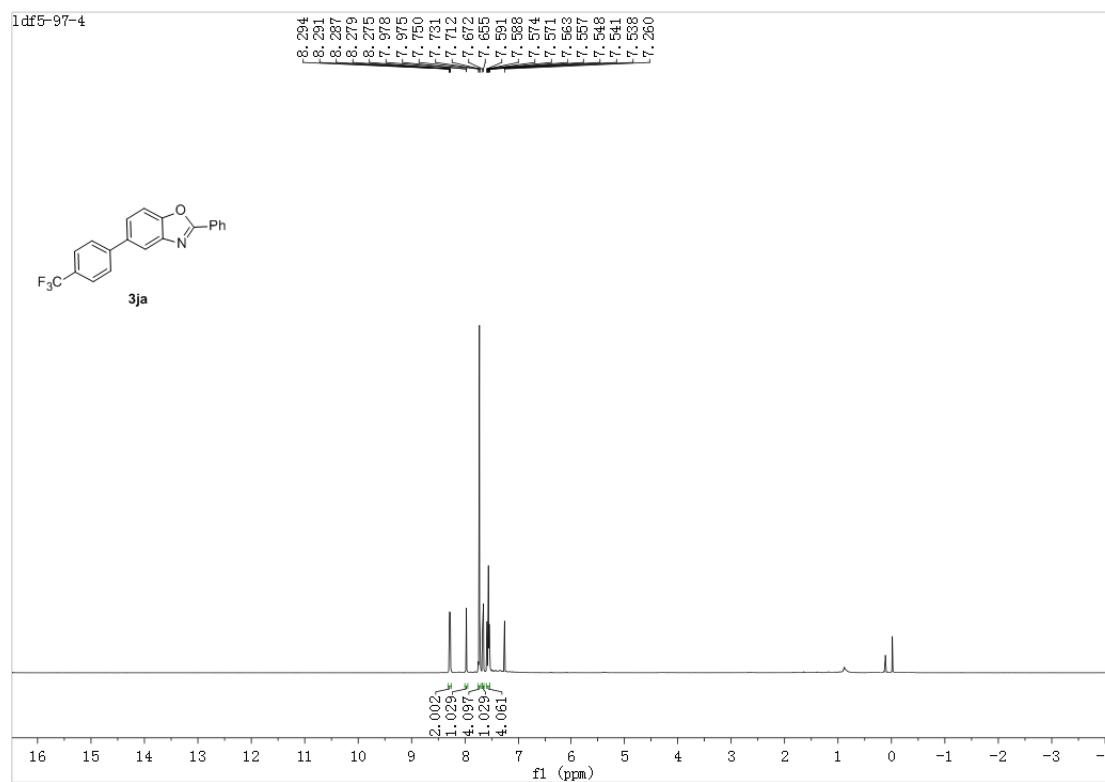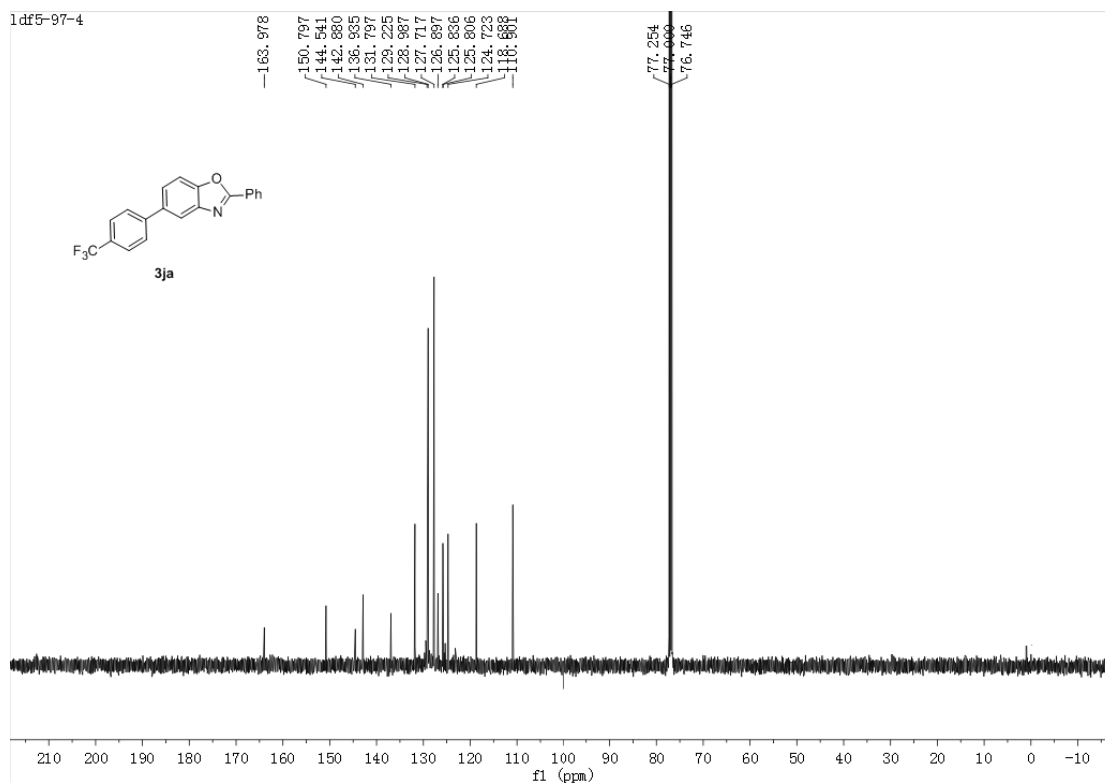

S16



S17

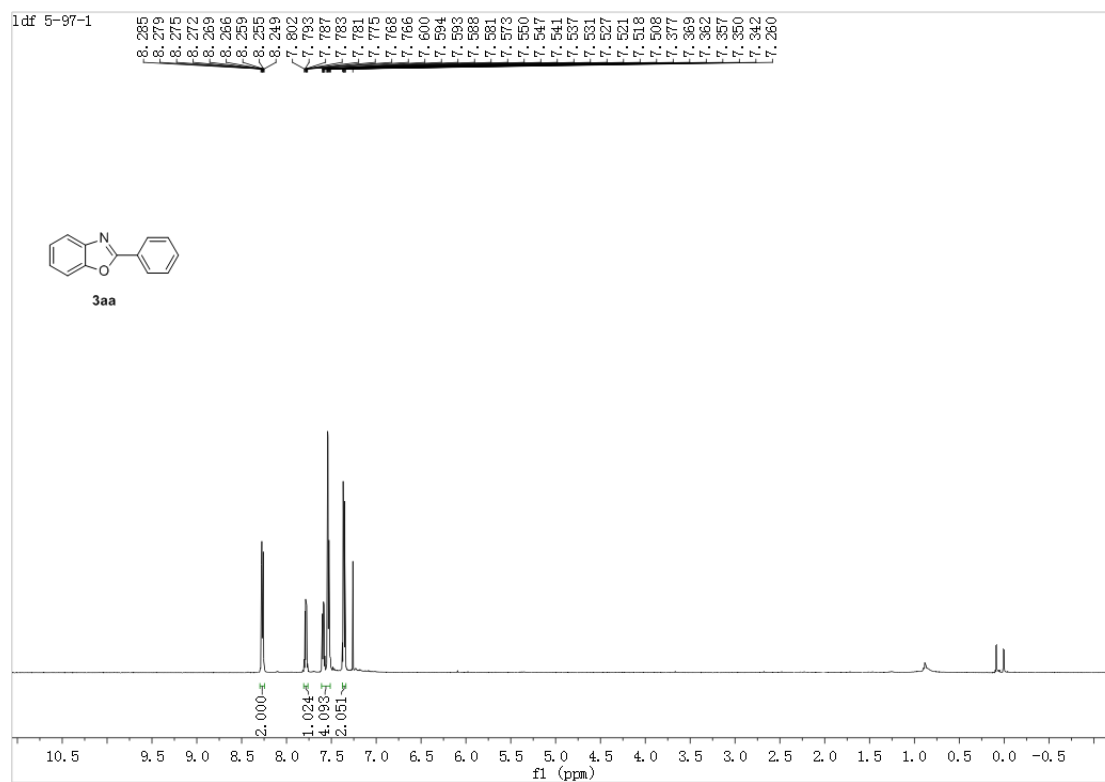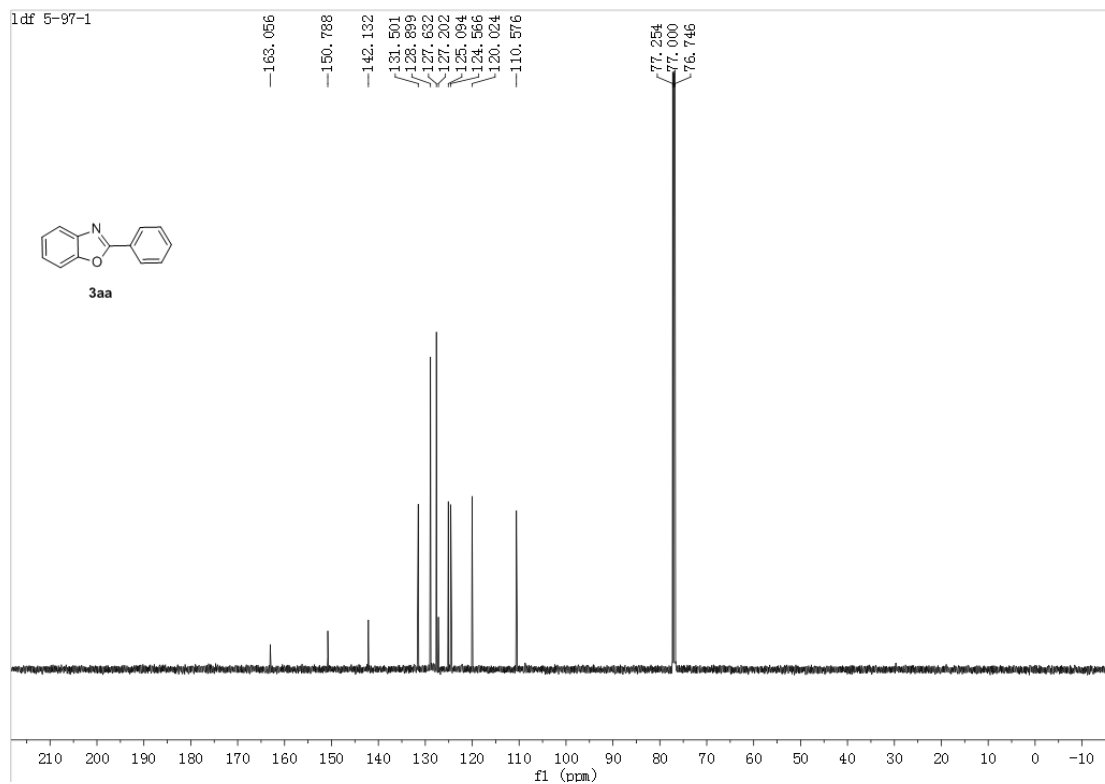

S17

S18

ldf5-71-1

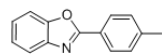

3ab

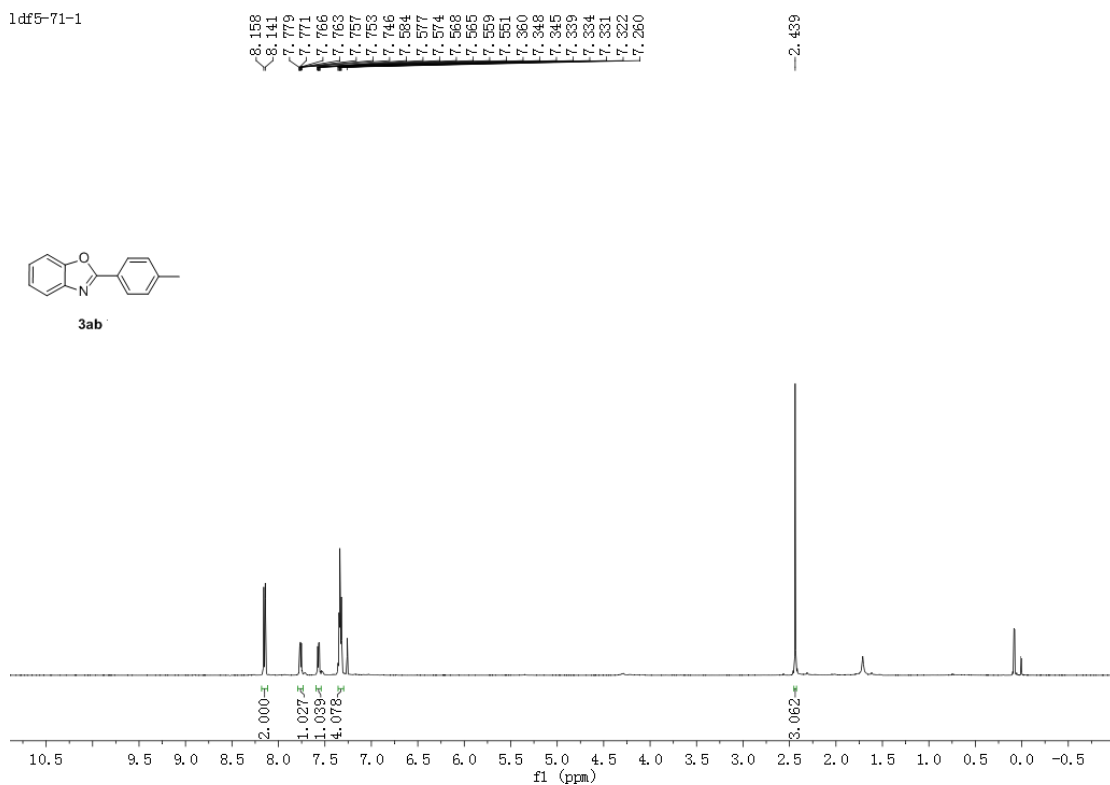

ldf5-71-1

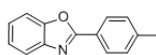

3ab

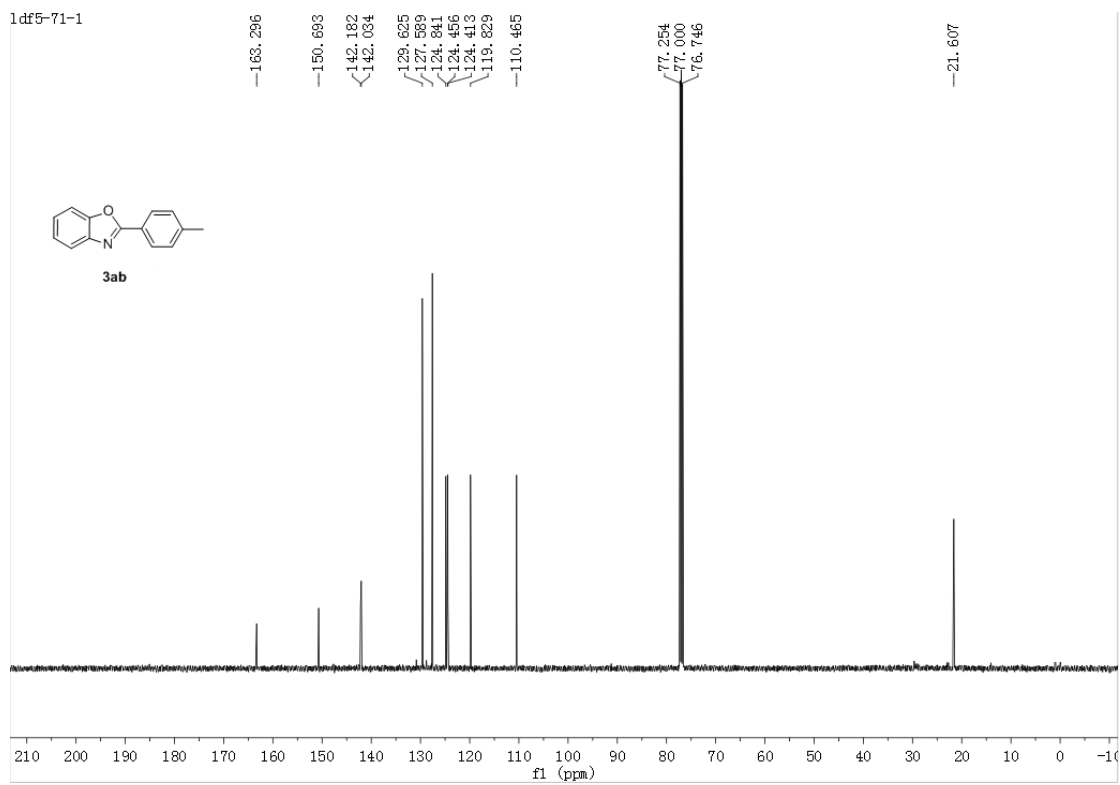

S18

# S19

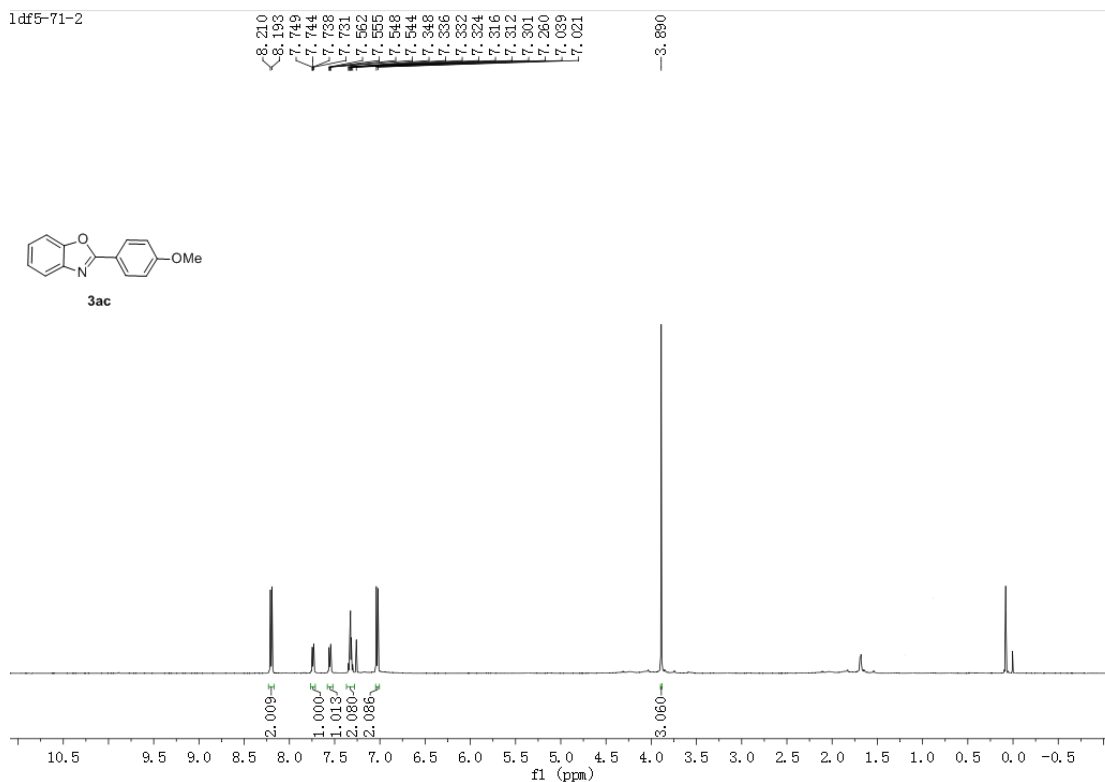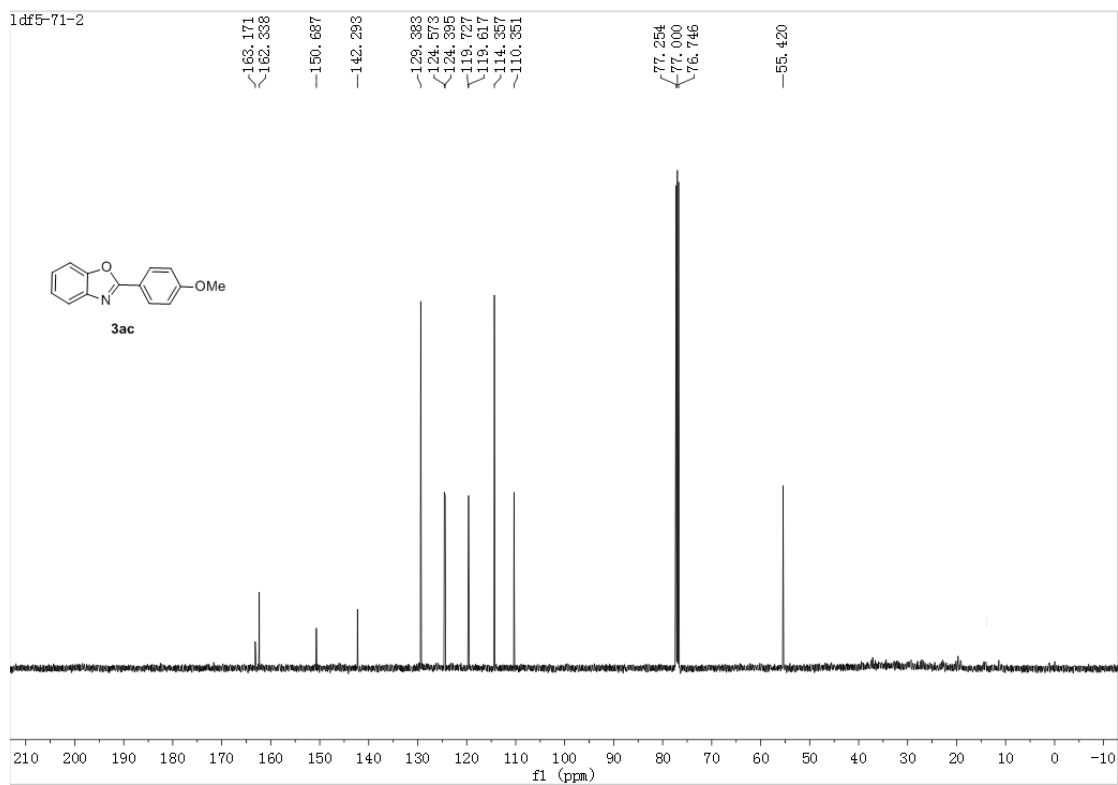

S20

1df5-72-2

8.177  
8.160  
7.783  
7.774  
7.769  
7.766  
7.760  
7.756  
7.581  
7.573  
7.572  
7.568  
7.563  
7.555  
7.361  
7.346  
7.342  
7.335  
7.331  
7.321  
7.260

2.711  
2.695  
2.680  
1.655  
1.640  
1.413  
1.398  
1.383  
1.369  
1.353  
1.338

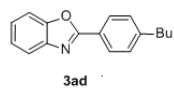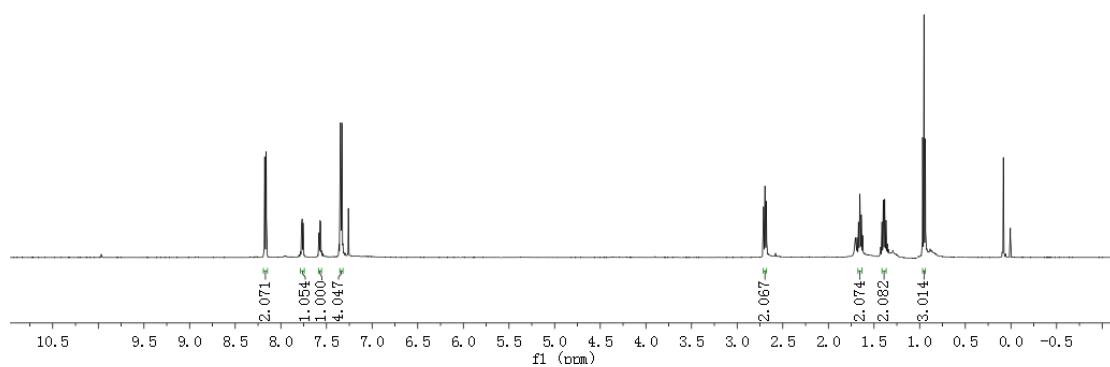

1df5-72-2

163.331  
150.709  
147.023  
142.206  
128.965  
127.617  
124.827  
124.582  
124.447  
119.836  
110.468

77.254  
77.000  
76.746

35.695  
33.279

22.330  
13.831

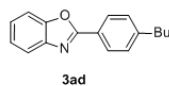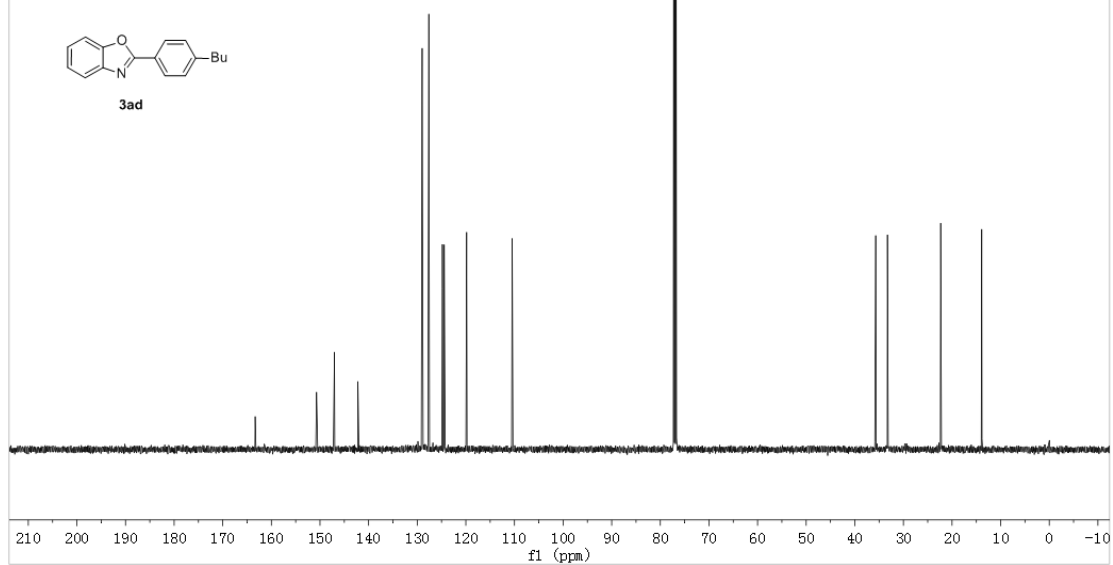

S20

S21

ldf5-72-1

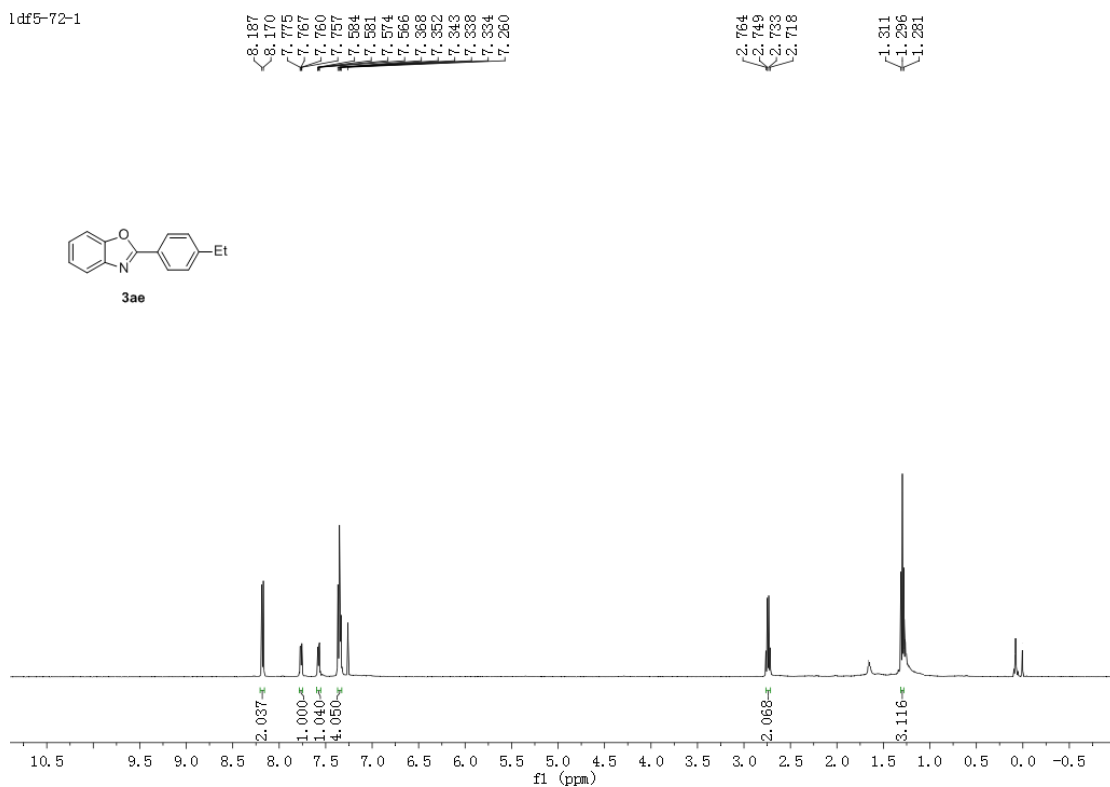

ldf5-72-1

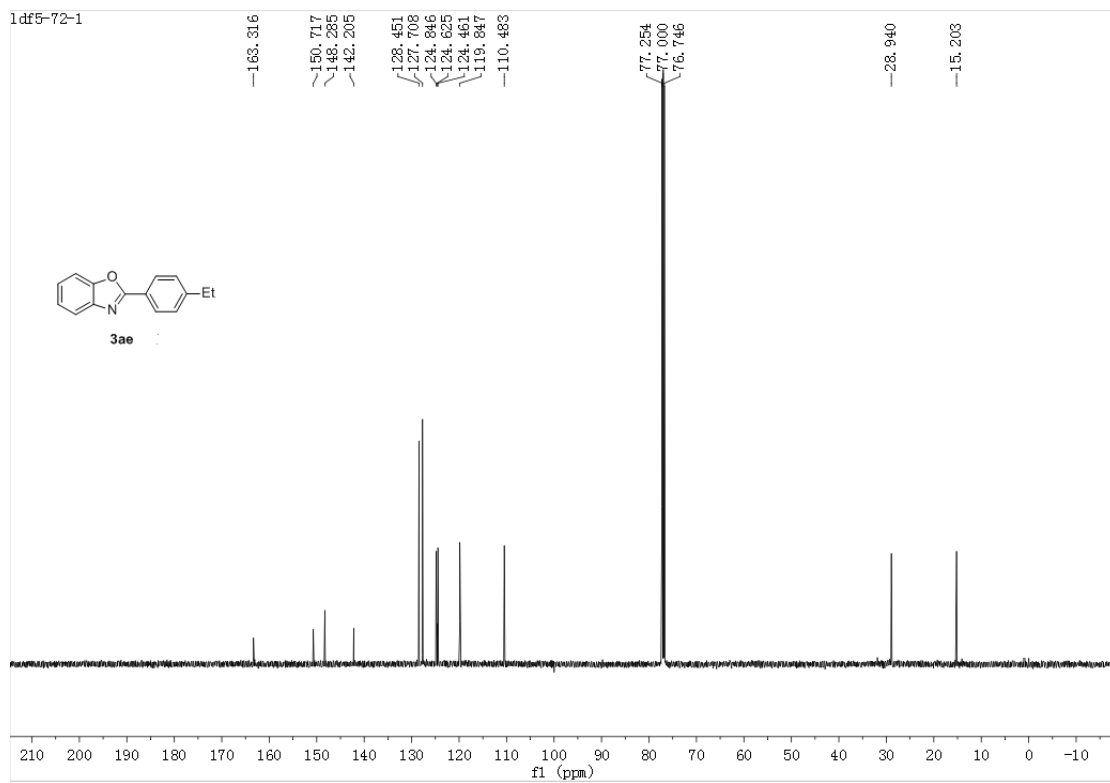

S21

S22

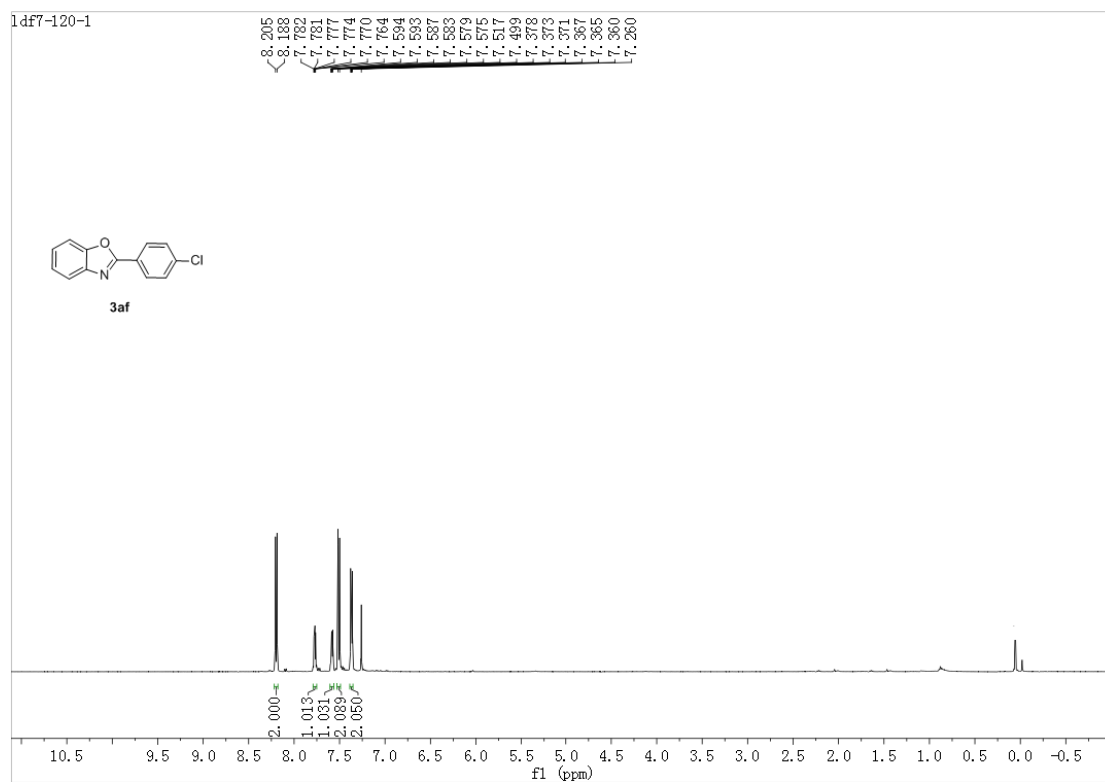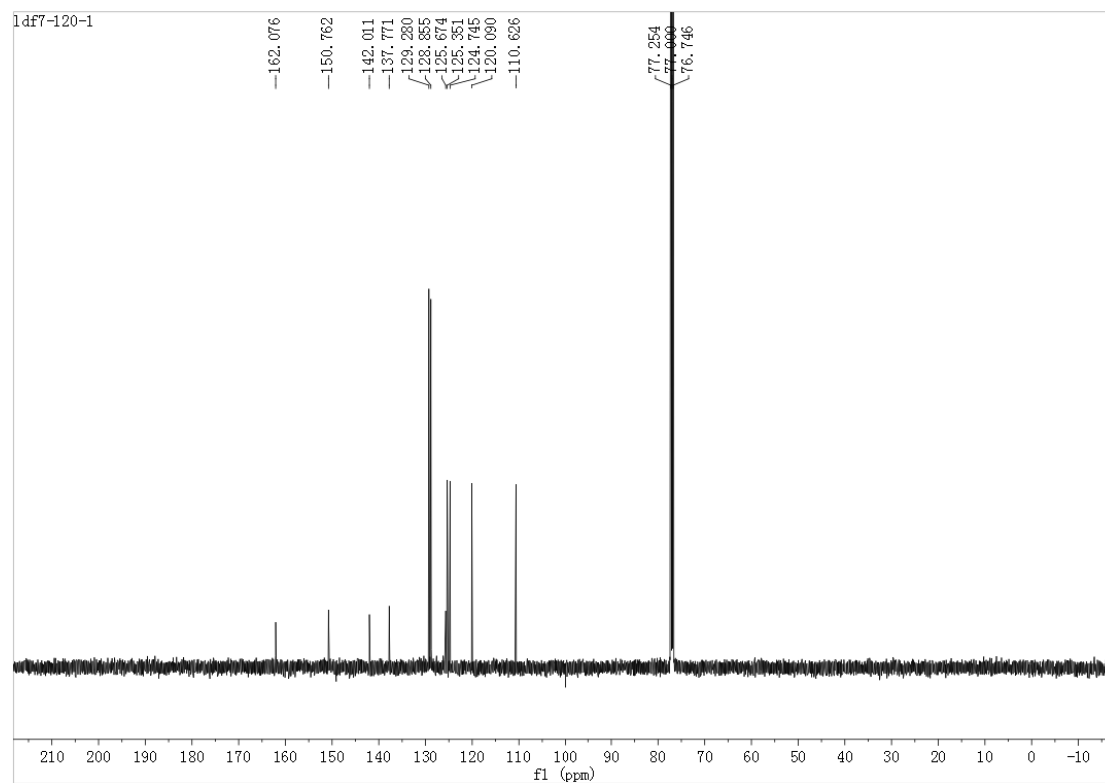

S22
